# Supplementary material for: High-performance flexible resistive random-access memory based on SnS2 quantum dots with a charge trapping/de-trapping effect
Source: Royal Society of Chemistry journal article supplement (doi:10.1039/d4nr00745j), 2024-01-01
Supplement: d4nr00745j1.pdf [file d4nr00745j1.pdf]

## Supporting Information

# High-performance Flexible Resistive Random-access Memory Based on SnS<sub>2</sub> Quantum Dots with Charge Trapping/de-trapping Effect

Hua An<sup>1†</sup>, Yiyang Li<sup>1†</sup>, Yi Ren<sup>1</sup>, Yili Wan<sup>1</sup>, Weigao Wang<sup>1</sup>, Zhenhua Sun<sup>1</sup>, Junwen Zhong<sup>2\*</sup>, and  
Zhengchun Peng<sup>1,3\*</sup>

1. *State Key Laboratory of Radio Frequency Heterogeneous Integration (Shenzhen University), School of Physics and Optoelectronic Engineering, Shenzhen University, Shenzhen, Guangdong, 518060, China*
2. *Department of Electromechanical Engineering, University of Macau, Macau, SAR, 999078, China*
3. *School of Electronic Information and Electrical Engineering, Shanghai Jiao Tong University, Shanghai 200240, P. R. China*

*E-mail: junwenzhong@um.edu.mo, zcpeng@szu.edu.cn*

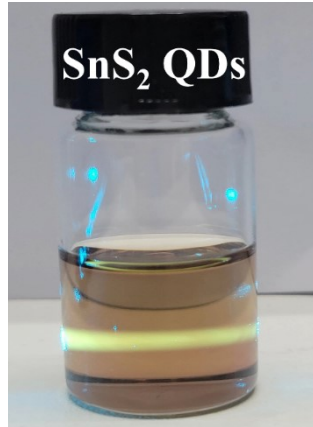

Figure S1. The photograph of the SnS<sub>2</sub> QD solution under an incident light beam.

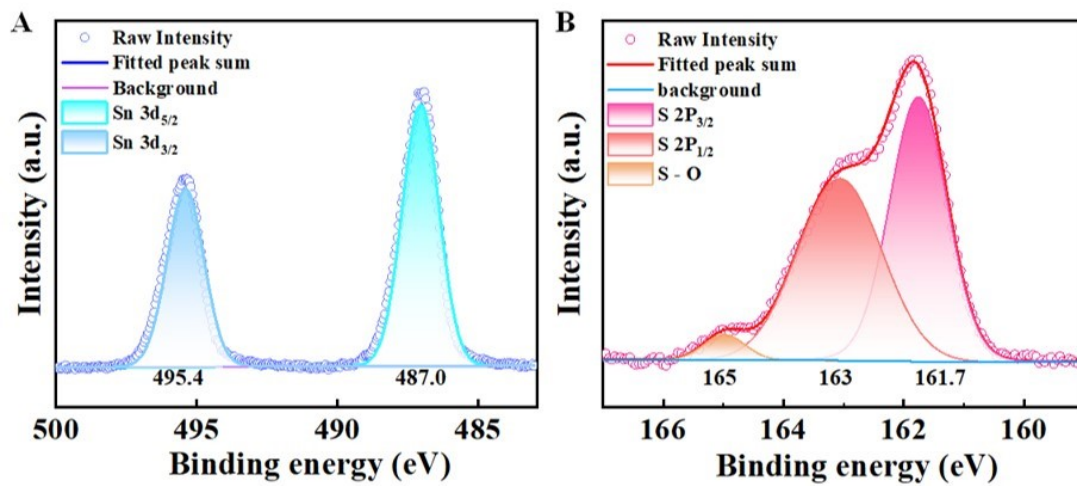

Figure S2. The high-resolution XPS spectra of (A) Sn+4 3d and (B) S-2 2p.

Figures S2 present the high-resolution XPS spectra. Through deconvolution, it is found that the S-2 2p core energy peaks at 161.7, 163, and 165 belongs to 2p<sub>3/2</sub>, 2p<sub>1/2</sub>, and S-O, respectively. Additionally, the split peaks at 487 and 495.4 are in accord with Sn+4 3d<sub>5/2</sub> and Sn+4 3d<sub>3/2</sub>.

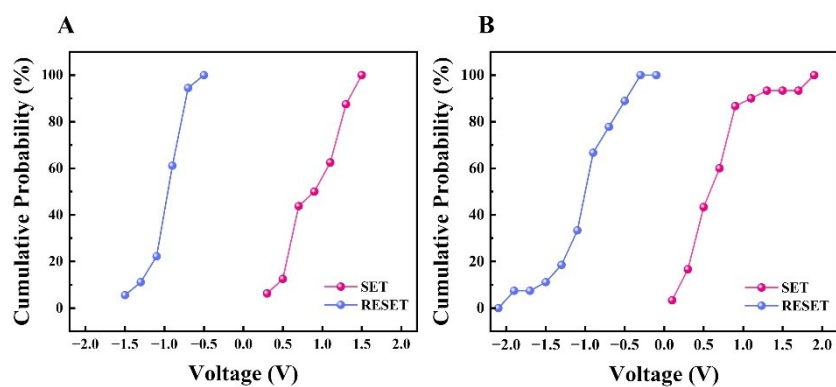

Figure S3. Cumulative probability of the SET and RESET voltages of a SnS<sub>2</sub> QD based memristor on rigid substrate (A) and a SnS<sub>2</sub> QD based memristor on flexible substrate (B).

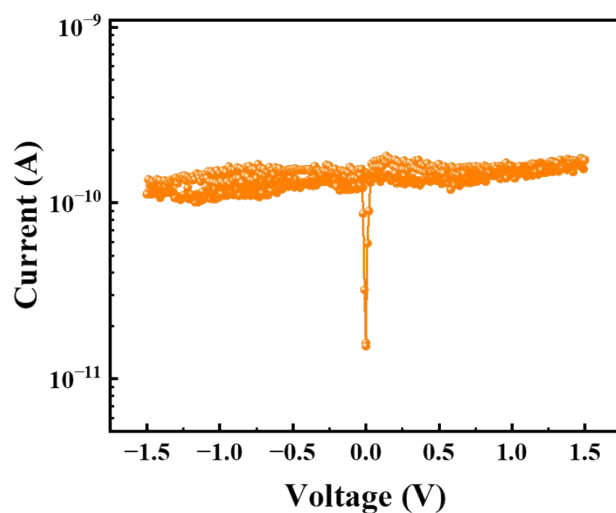

Figure S4. Current-voltage characteristics of Ag/PVP/Au devices.

The current-voltage characteristics within the voltage window of -1.5 V–1.5 V are shown in Figure S4. The current of the device without SnS<sub>2</sub> QDs stabilized around 10<sup>-10</sup> A with increasing voltage and no marked switching behavior occurred throughout the process.

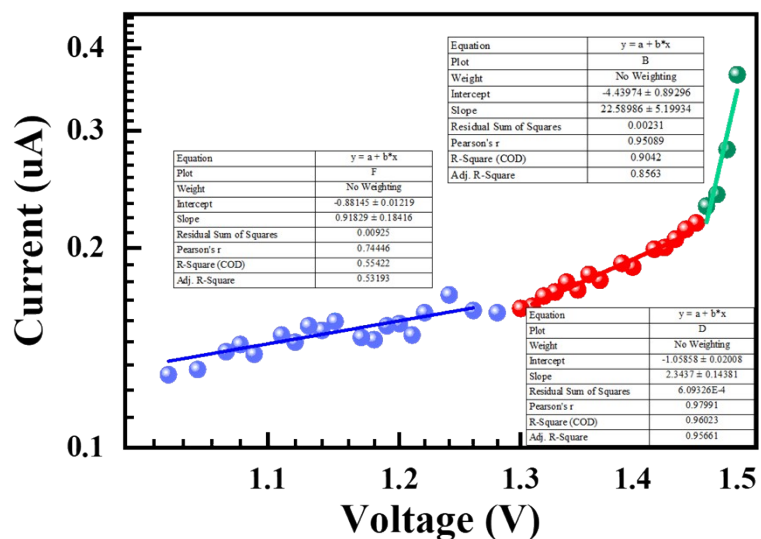

Figure S5. Specific fitting results to the switching region.

The linear fitting indicates a slope of  $0.92 \sim 1$  in blue, which means  $\log(I) \propto \log(V)$  in this region. The slope of red line is approximated as 2, and means  $\log(I) \propto \log(V^2)$ . Significantly, the slope of the green part is more than 2.
